# Supplementary material
Source: Research Square preprint supplement (doi:10.21203/rs.3.rs-9782080/v1)
Supplement: Supplementary file 1 [file 19611020760d9038085aea7a.docx]

**Supplementary tables**

**Supplementary Table S1. Disease Activity Score Validity, VAS Agreement, Activity Band Distributions, and BMI Reclassification**

**Part A — Bland-Altman Agreement Between Disease Activity Composites (n=200)**

| Score pair | Mean diff | SD | 95% LoA | Spearman ρ | κ (bands) | Agreement |
| --- | --- | --- | --- | --- | --- | --- |
| DAS28-ESR − DAS28-CRP | +0.184 | 0.218 | −0.24 to +0.61 | 0.941 | 0.680 | Substantial |
| DAS28-ESR − DAS28-CRP(3) | +0.189 | 0.325 | −0.45 to +0.83 | 0.874 | 0.614 | Substantial |
| DAS28-CRP − DAS28-CRP(3) | +0.006 | 0.203 | −0.39 to +0.40 | 0.939 | 0.780 | Near-excellent |
| DAS28-ESR − SDAI | −19.58 | 7.36 | −34.01 to −5.15 | 0.907 | 0.664 | Substantial |
| DAS28-ESR − CDAI | −13.77 | 5.37 | −24.28 to −3.25 | 0.904 | 0.482 | Moderate |
| SDAI − CDAI | +5.82 | 4.18 | −2.38 to +14.02 | 0.881 | 0.644 | Substantial |

**Part B — Patient vs Physician VAS Agreement**

| Metric | Value |
| --- | --- |
| Spearman ρ | 0.860 (p = 1.2×10⁻⁵⁹) |
| Mean difference (Patient − Physician), mm | +4.59 |
| SD of differences, mm | 8.28 |
| Discordance >20 mm, n (%) | 3 (1.5%) |
| Discordance >25 mm, n (%) | 1 (0.5%) |

**Part C — Disease Activity Band Distribution by Group**

| Score | Remission/Low/Moderate/High | Early RA (n=115) | Established RA (n=85) |
| --- | --- | --- | --- |
| DAS28-ESR | R/L/M/H | 1/2/60/52 | 0/0/37/48 |
| DAS28-CRP | R/L/M/H | 1/1/72/41 | 0/0/52/33 |
| DAS28-CRP(3) | R/L/M/H | 0/2/73/40 | 0/1/55/29 |
| SDAI | R/L/M/H | 0/4/64/47 | 0/2/49/34 |
| CDAI | R/L/M/H | 1/11/81/22 | 0/2/49/34 |

**Part D — BMI Reclassification: WHO International vs Asia-Pacific**

| Category | WHO International | WHO Asia-Pacific | Reclassified upward |
| --- | --- | --- | --- |
| Underweight | 30 (15.0%) | 30 (15.0%) | 0 |
| Normal | 122 (61.0%) | 86 (43.0%) | 36 → Overweight |
| Overweight | 46 (23.0%) | 66 (33.0%) | 16 → Obese I |
| Obese class I | 2 (1.0%) | 17 (8.5%) | 1 → Obese II |
| Obese class II | 0 (0.0%) | 1 (0.5%) | — |
| Total reclassified |  |  | **53/200 (26.5%)** |

Cohen's κ between schemes = 0.585.

**Supplementary Table S2. Spearman Correlations, Stratified Antibody Matrices, Within-Early-RA Categorical Comparisons, and Structural Damage Cross-Tabulations**

**Part A — Spearman Correlations of Anti-CarP with Disease Activity and Damage**

| Variable | Overall ρ | Overall FDR-q | Early RA ρ | Early RA p | Established RA ρ | Established RA p |
| --- | --- | --- | --- | --- | --- | --- |
| HAQ-DI | +0.339 | **1.2×10⁻⁵** | +0.171 | 0.067 | +0.180 | 0.10 |
| Sharp/vdH | +0.244 | **3.5×10⁻³** | +0.215 | **0.021** | +0.058 | 0.60 |
| DAS28-ESR | +0.225 | **6.4×10⁻³** | +0.262 | **0.005** | +0.121 | 0.27 |
| DAS28-CRP | +0.179 | **0.034** | +0.232 | **0.013** | +0.077 | 0.49 |
| CDAI | +0.175 | **0.034** | +0.197 | **0.034** | +0.110 | 0.32 |
| DAS28-CRP(3) | +0.170 | **0.034** | +0.236 | **0.011** | +0.043 | 0.70 |
| SDAI | +0.149 | 0.067 | +0.192 | **0.040** | +0.062 | 0.57 |
| ESR | +0.119 | 0.15 | +0.193 | **0.039** | −0.058 | 0.60 |
| CRP | +0.115 | 0.15 | +0.181 | 0.053 | +0.015 | 0.89 |
| Patient VAS | +0.119 | 0.15 | +0.144 | 0.12 | +0.024 | 0.83 |
| Morning stiffness | +0.106 | 0.20 | +0.119 | 0.21 | +0.044 | 0.69 |
| TJC28 | +0.089 | 0.20 | +0.087 | 0.36 | +0.083 | 0.45 |
| SJC28 | +0.075 | 0.20 | +0.119 | 0.20 | −0.058 | 0.60 |

Bold: FDR-q < 0.05 (overall) or p < 0.05 (stratified).

**Part B — Within-Group Pairwise Antibody Correlations (Spearman ρ)**

Early RA (n=115):

|  | Anti-CCP | Anti-CarP | RF | Anti-MCV |
| --- | --- | --- | --- | --- |
| Anti-CCP | 1.000 | −0.124 | −0.016 | +0.082 |
| Anti-CarP | −0.124 | 1.000 | +0.041 | −0.053 |
| RF | −0.016 | +0.041 | 1.000 | +0.104 |
| Anti-MCV | +0.082 | −0.053 | +0.104 | 1.000 |

Established RA (n=85):

|  | Anti-CCP | Anti-CarP | RF | Anti-MCV |
| --- | --- | --- | --- | --- |
| Anti-CCP | 1.000 | +0.189 | +0.072 | +0.183 |
| Anti-CarP | +0.189 | 1.000 | +0.147 | −0.079 |
| RF | +0.072 | +0.147 | 1.000 | −0.058 |
| Anti-MCV | +0.183 | −0.079 | −0.058 | 1.000 |

**Part C — Anti-CarP × Structural Damage Cross-Tabulations**

| Outcome | Anti-CarP+ (n=108) | Anti-CarP− (n=92) | OR (95% CI) | χ² p | FDR-q |
| --- | --- | --- | --- | --- | --- |
| Joint deformity | 41 (38.0%) | 17 (18.5%) | 2.70 (1.40–5.19) | 0.004 | **0.012** |
| Radiographic erosions | 58 (53.7%) | 35 (38.0%) | 1.89 (1.07–3.33) | 0.038 | 0.051 |

Sharp/vdH tertile distribution by anti-CarP status:

| Tertile | Anti-CarP+ n (%) | Anti-CarP− n (%) | χ² p |
| --- | --- | --- | --- |
| T3 (highest) | 42 (38.9%) | 24 (26.1%) | 0.15 |
| T2 (middle) | 34 (31.5%) | 33 (35.9%) |  |
| T1 (lowest) | 32 (29.6%) | 35 (38.0%) |  |

**Part D — Within Early RA: Categorical Comparison (Anti-CarP+ vs Anti-CarP−)**

| Variable | Anti-CarP+ | Anti-CarP− | OR (95% CI) | p | FDR-q |
| --- | --- | --- | --- | --- | --- |
| Meets ACR/EULAR ≥6 | 38Y/16N | 27Y/34N | 2.99 (1.3–6.6) | 0.009 | 0.10 |
| RF positive | 10P/44N | 6P/55N | 2.08 (0.71–6.1) | 0.28 | 0.85 |
| Radiographic erosions | 9Y/45N | 8Y/53N | 1.33 (0.48–3.7) | 0.79 | 1.00 |
| Anti-MCV positive | 23P/31N | 23P/38N | 1.23 (0.58–2.6) | 0.73 | 1.00 |
| Anti-Ra33 positive | 17P/37N | 14P/47N | 1.54 (0.66–3.6) | 0.41 | 0.99 |
| ANA positive | 11P/43N | 11P/50N | 1.16 (0.46–2.9) | 0.94 | 1.00 |
| HLA-DRB1 SE positive | 16P/38N | 26P/35N | 0.57 (0.26–1.2) | 0.21 | 0.85 |
| Hypertension | 5Y/49N | 8Y/53N | 0.68 (0.21–2.2) | 0.72 | 1.00 |
| Diabetes mellitus | 4Y/50N | 7Y/54N | 0.62 (0.17–2.2) | 0.54 | 1.00 |
| Hypothyroidism | 8Y/46N | 11Y/50N | 0.79 (0.29–2.1) | 0.83 | 1.00 |

Fisher's exact test for all variables. FDR: Benjamini-Hochberg correction.

**Supplementary Table S3. Extended Serological Panel, Six-Antibody Phenotype Map, Renal Function, and Gene–Environment Interaction**

**Part A — Triple-Seronegative Subgroup (CCP−/CarP−/RF−; n=55)**

| Marker / Variable | Value |
| --- | --- |
| Anti-MCV positive, n (%) [Wilson 95% CI] | 21 (38.2%) [26.5–51.4%] |
| HLA-DRB1 SE positive, n (%) [CI] | 23 (41.8%) [29.7–55.0%] |
| Anti-Ra33 positive, n (%) [CI] | 12 (21.8%) [12.9–34.4%] |
| ANA positive, n (%) [CI] | 11 (20.0%) [11.6–32.4%] |
| Truly all-6-marker-negative (of n=200) | 22 (11.0%) |
| DAS28-ESR, median | 4.89 |
| Sharp/vdH score, median | 9 |
| HAQ-DI, median | 0.26 |
| Joint deformity present | 0 (0%) |
| Radiographic erosions present | 8 (14.5%) |

**Part B — Six-Antibody Phenotype Map**

Number of positive antibodies per patient:

| # Positive (/6) | n | % |
| --- | --- | --- |
| 0 (truly seronegative) | 22 | 11.0% |
| 1 | 36 | 18.0% |
| 2 | 49 | 24.5% |
| 3 | 41 | 20.5% |
| 4 | 33 | 16.5% |
| 5 | 17 | 8.5% |
| 6 (all positive) | 2 | 1.0% |

Top 8 observed patterns (Anti-CCP/Anti-CarP/RF/Anti-MCV/Anti-Ra33/ANA):

| Rank | Pattern | Group | n | % |
| --- | --- | --- | --- | --- |
| 1 | All negative | Early RA | 22 | 11.0% |
| 2 | +/+/+/+/−/− | Established | 19 | 9.5% |
| 3 | −/+/−/+/−/− | Early RA | 14 | 7.0% |
| 4 | +/+/+/−/−/− | Established | 14 | 7.0% |
| 5 | −/+/−/−/−/− (CarP-only) | Early RA | 12 | 6.0% |
| 6 | +/−/+/+/−/− | Established | 12 | 6.0% |
| 7 | −/−/−/+/−/− (MCV-only) | Early RA | 11 | 5.5% |
| 8 | +/+/+/+/+/− (quintuple) | Established | 9 | 4.5% |

26 patients (22.6% of Early RA) were anti-CCP-negative/anti-CarP-positive. 40 of 64 possible binary patterns were observed.

**Part C — Anti-CarP and Renal Function**

| Stratum | n | Spearman ρ | p | Anti-CarP+ % | Median eGFR |
| --- | --- | --- | --- | --- | --- |
| Overall | 200 | −0.127 | 0.072 | 54.0% | — |
| Early RA | 115 | −0.042 | 0.66 | 47.0% | — |
| Established RA | 85 | +0.013 | 0.90 | 63.5% | — |
| CKD G1 (eGFR ≥90) | 153 | — | — | 54.2% | 113.0 |
| CKD G2 (eGFR 60–89) | 44 | — | — | 54.5% | 78.7 |
| CKD G3a (eGFR 45–59) | 2 | — | — | 50.0% | 58.0 |
| CKD G3b (eGFR 30–44) | 1 | — | — | 0.0% | 43.8 |

**Part D — Gene–Environment Interaction: HLA-SE × Smoking × Anti-CCP (anti-CCP-positive patients only; n=85)**

| SE status | Smoking | n | Median anti-CCP (U/mL) | Mean anti-CCP (U/mL) |
| --- | --- | --- | --- | --- |
| SE+ | Never-smoker | 56 | 171.4 | 215.3 |
| SE+ | Smoker | 5 | 180.7 | 457.5 |
| SE− | Never-smoker | 22 | 164.1 | 190.4 |
| SE− | Smoker | 2 | 130.4 | 130.4 |

Anti-CCP vs pack-years: Spearman ρ = +0.068 (p = 0.54). Cell sizes in smoker strata preclude formal inference.
